# Supplementary material for: Abrupt termination of the Little Ice Age in the Alps in the mid-19 th century: lessons from a multi-proxy tree-ring reconstruction of glacier mass balance
Source: Copernicus journal article supplement (doi:10.5194/egusphere-2023-1746), 2023-08-04
Supplement: Supplementary file 1 [file egusphere-2023-1746-supplement.pdf]

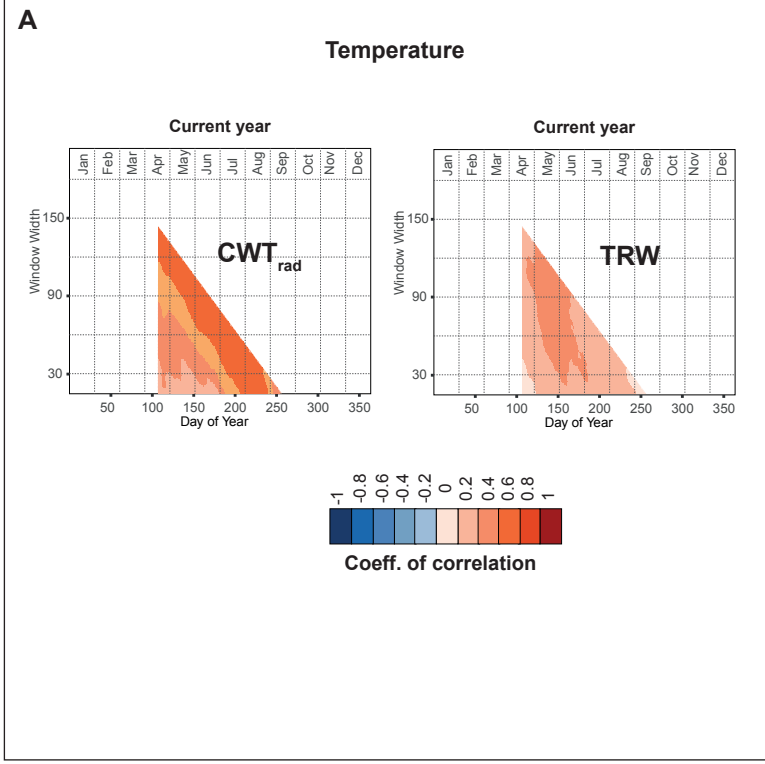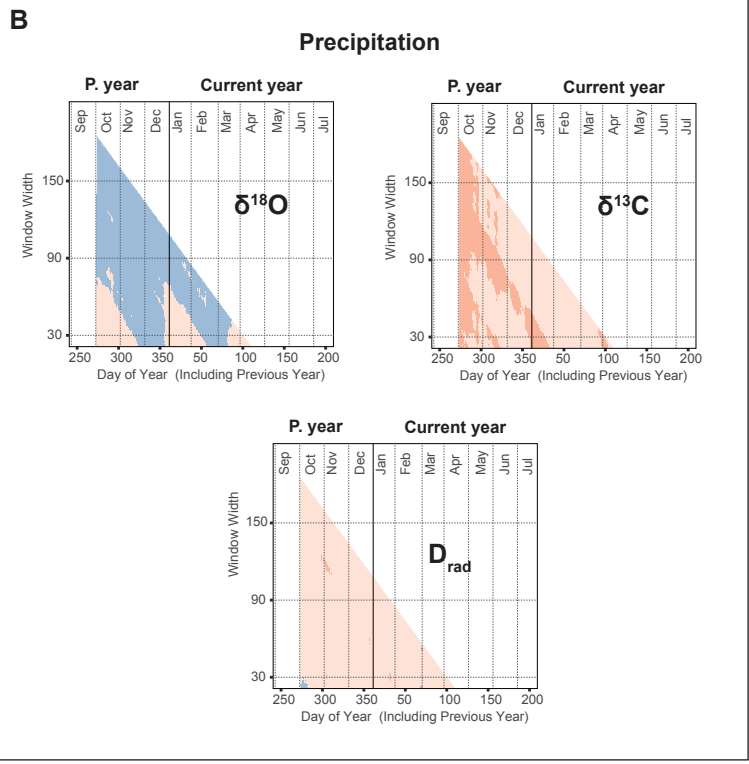

**Figure S1.** (A) Correlations of the raw radial cell-wall thickness (CWTrad) and spline detrended ring width (TRW) chronologies with air temperatures reconstructed with the Imfeld et al. (2023) dataset over time windows ranging from 121-to 273-day windows. (B) Correlations of the raw  $\delta^{18}O$ ,  $\delta^{13}C$  and D<sub>rad</sub> chronologies and Imfeld23 precipitation sums over time windows ranging from 274 (n-1) to 120-day windows.
