# Supplementary material for: Abrupt termination of the Little Ice Age in the Alps in the mid-19 th century: lessons from a multi-proxy tree-ring reconstruction of glacier mass balance
Source: Copernicus journal article supplement (doi:10.5194/egusphere-2023-1746), 2023-08-04
Supplement: Supplementary file [file egusphere-2023-1746-AC1-supplement.pdf]

**A**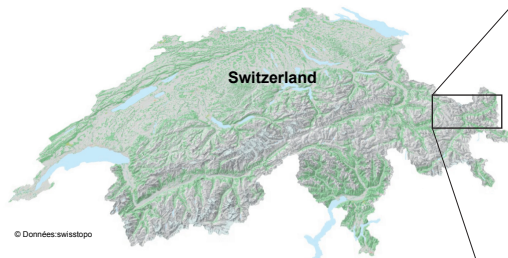

▲ Silvrettagletscher

■ God da Tamangur *P. cembra* forest

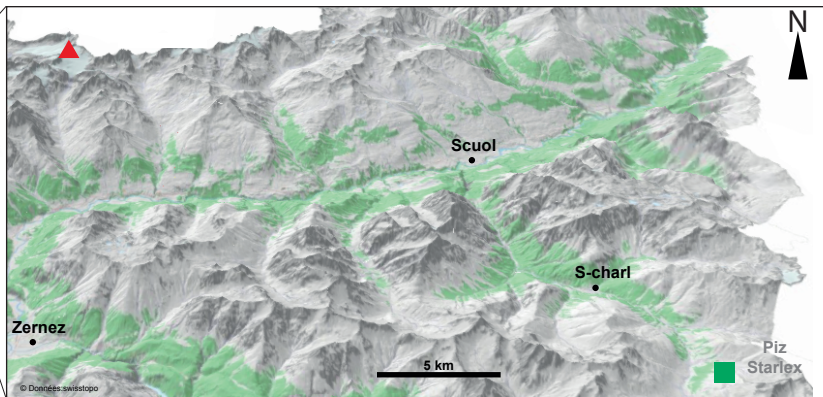**B**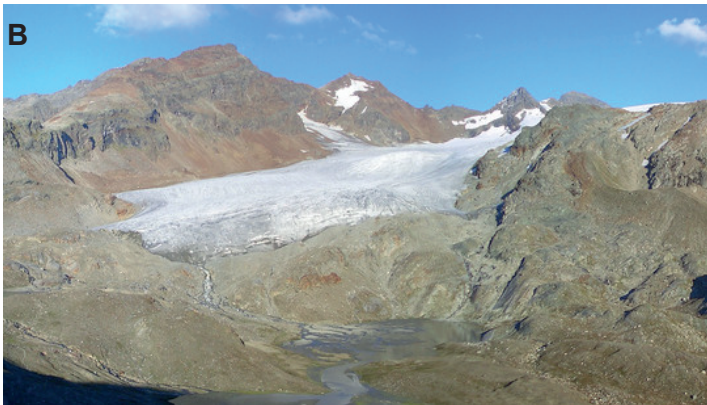**C**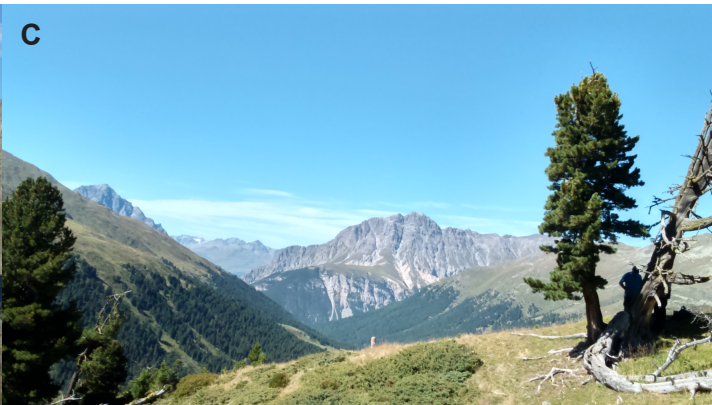

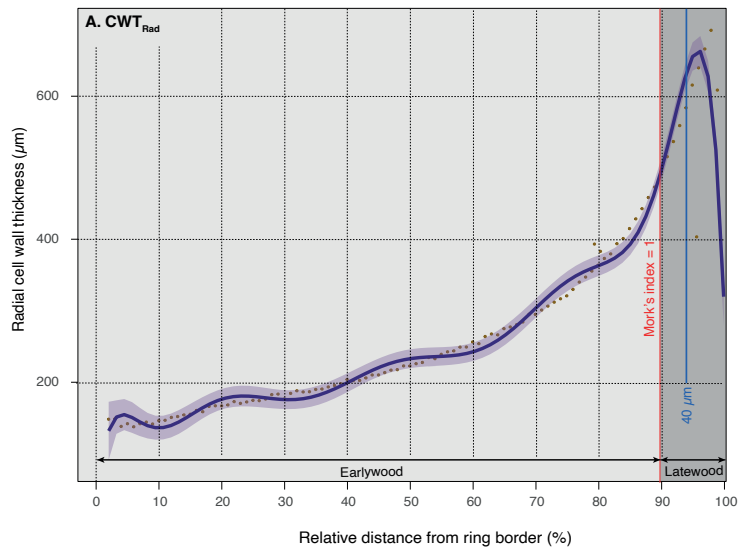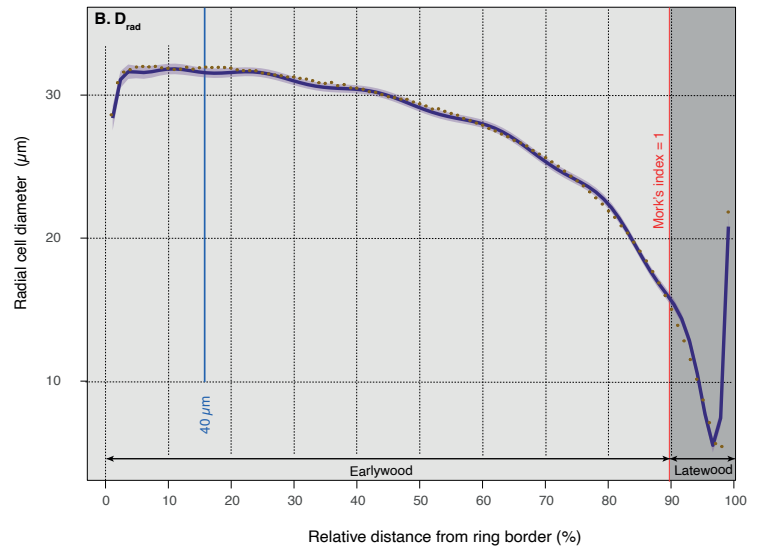

## A. Temperature

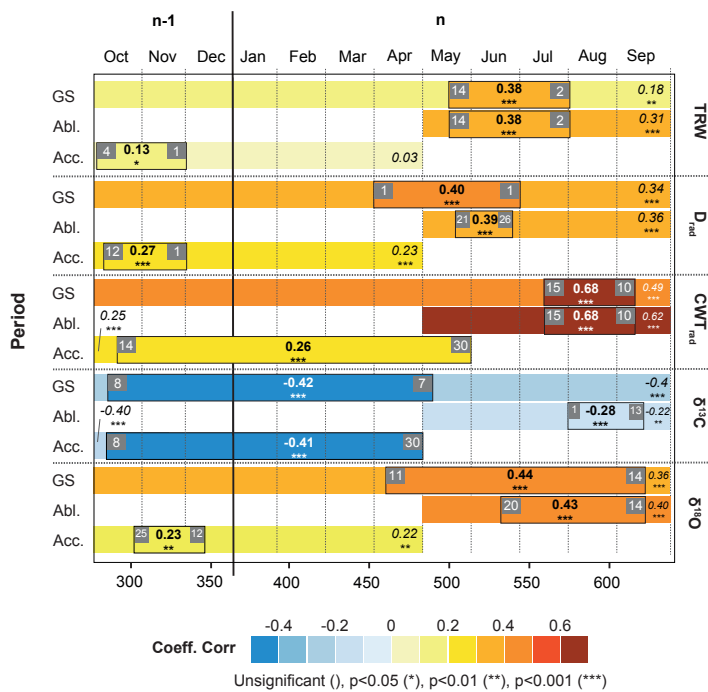

## B. Precipitation

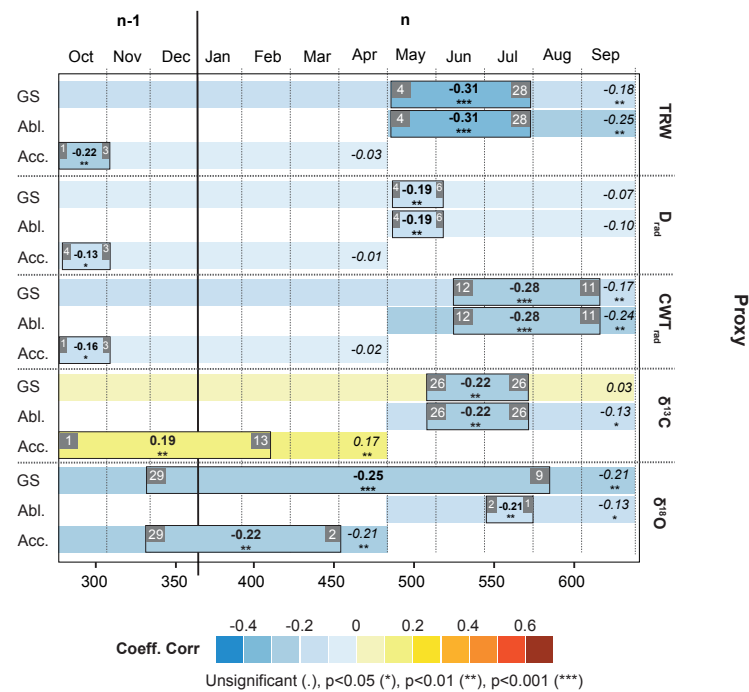

## C. Winter mass balance

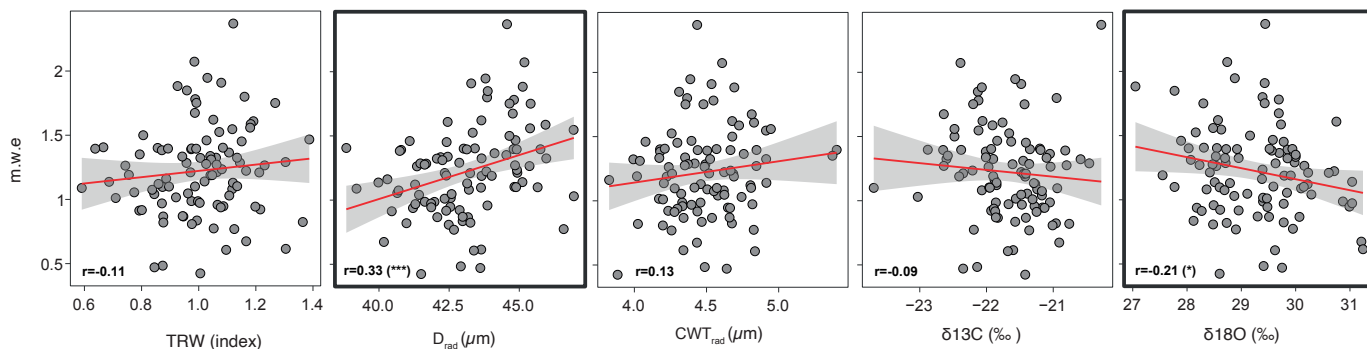

## D. Summer mass balance

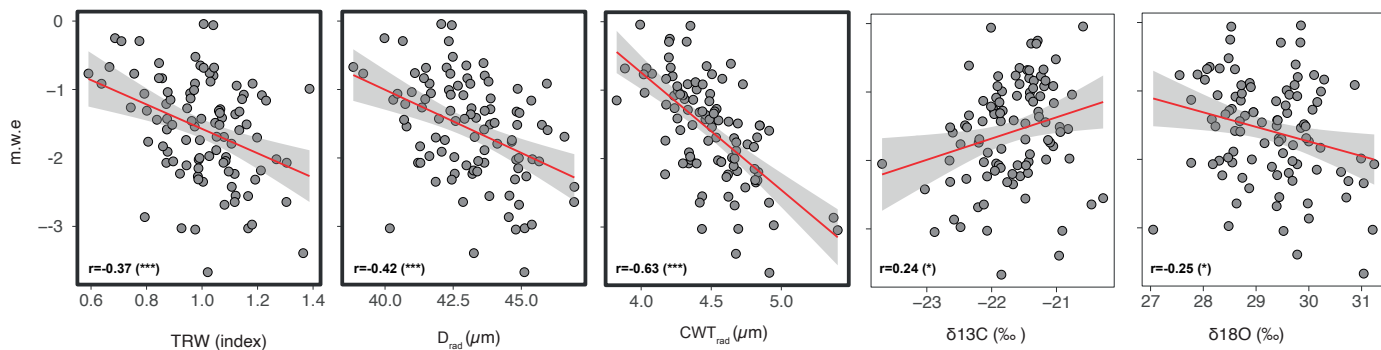

**A. Winter mass balance**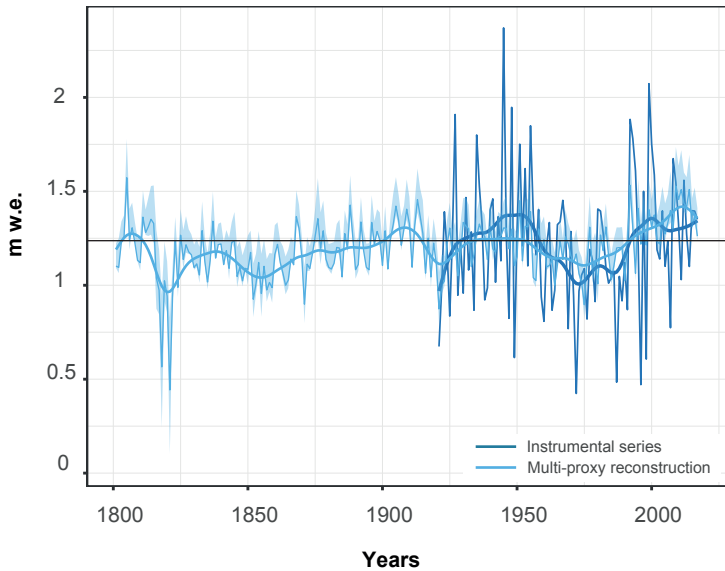**B. Summer mass balance**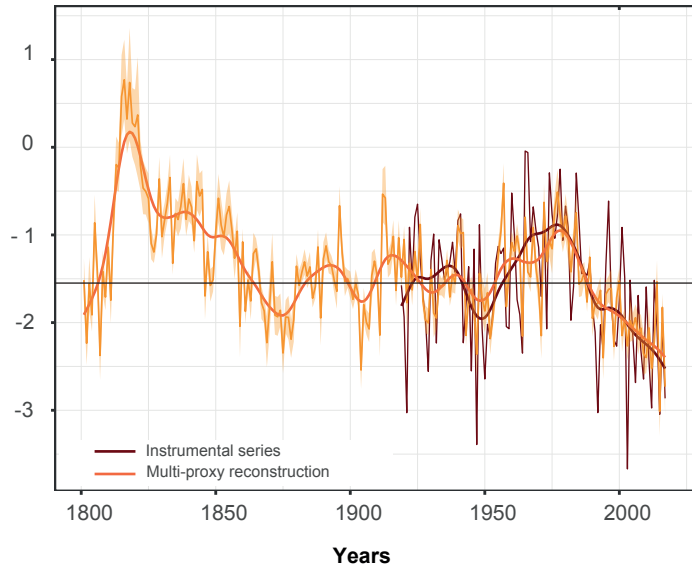



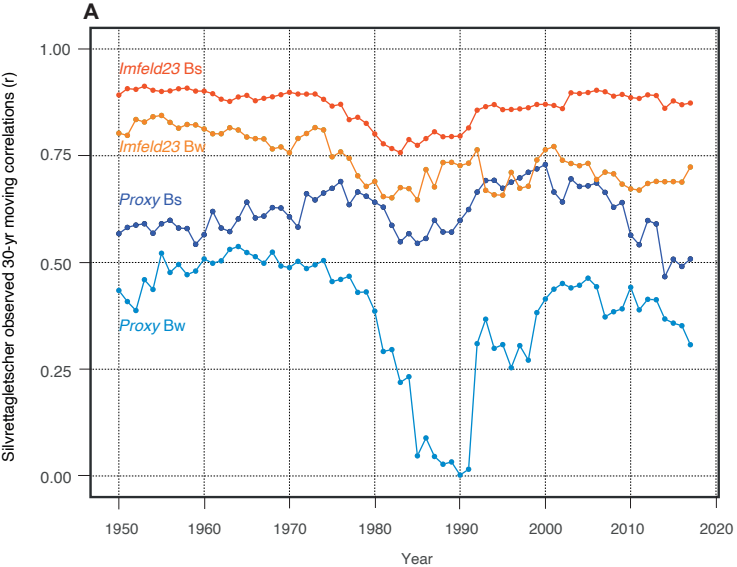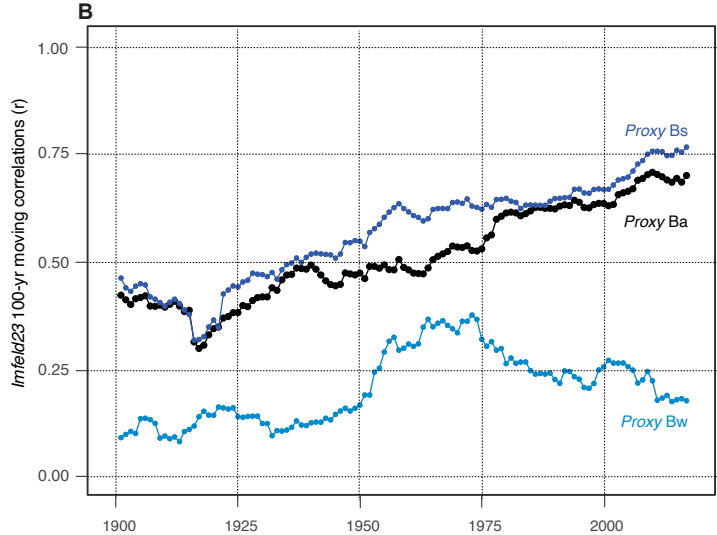

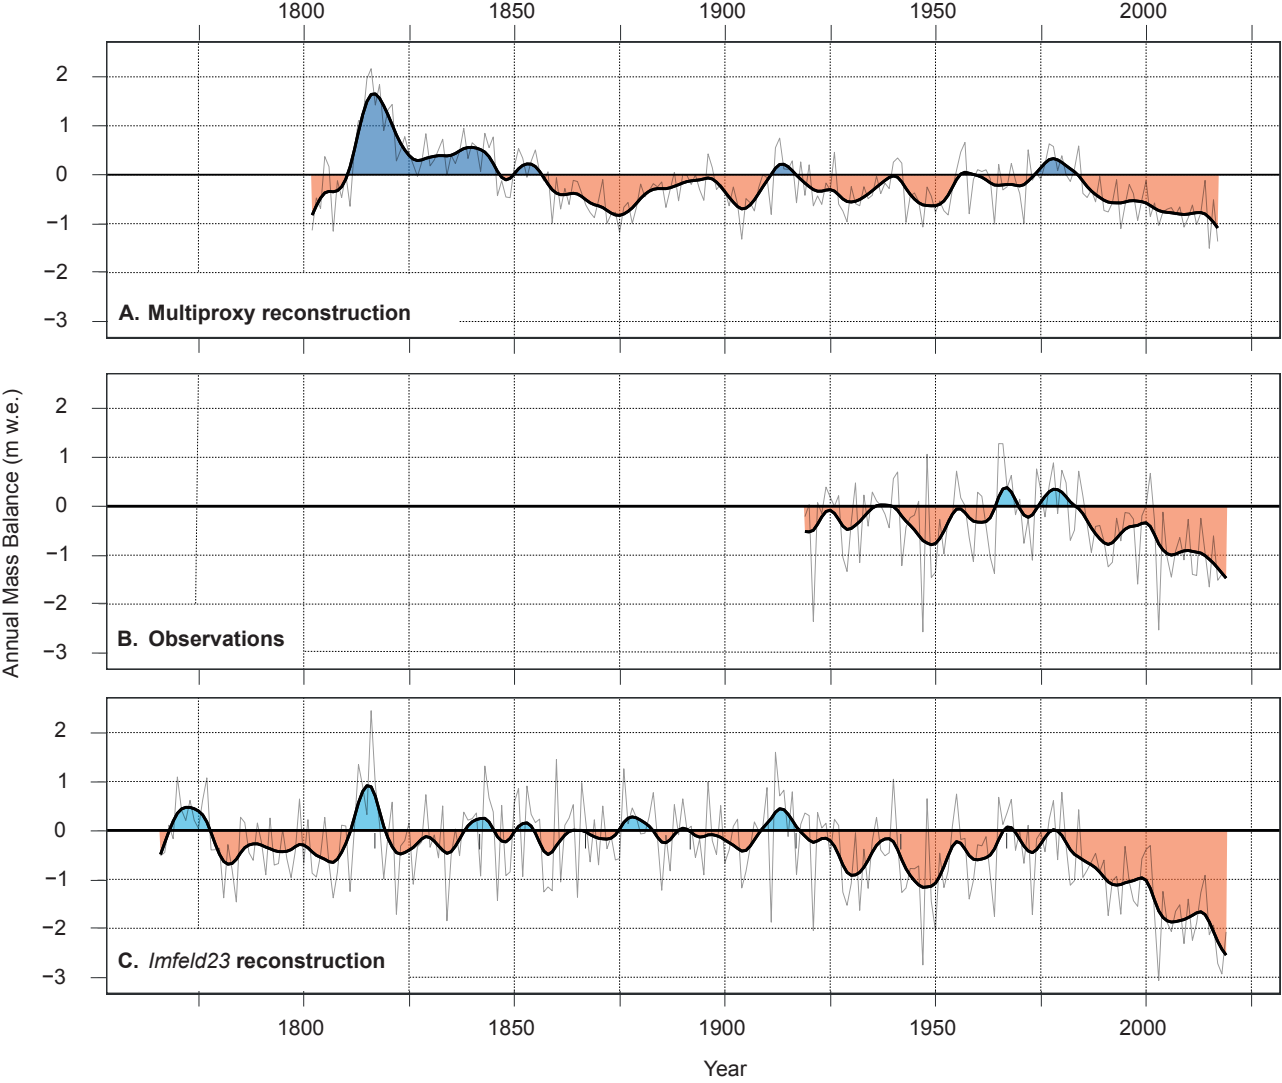

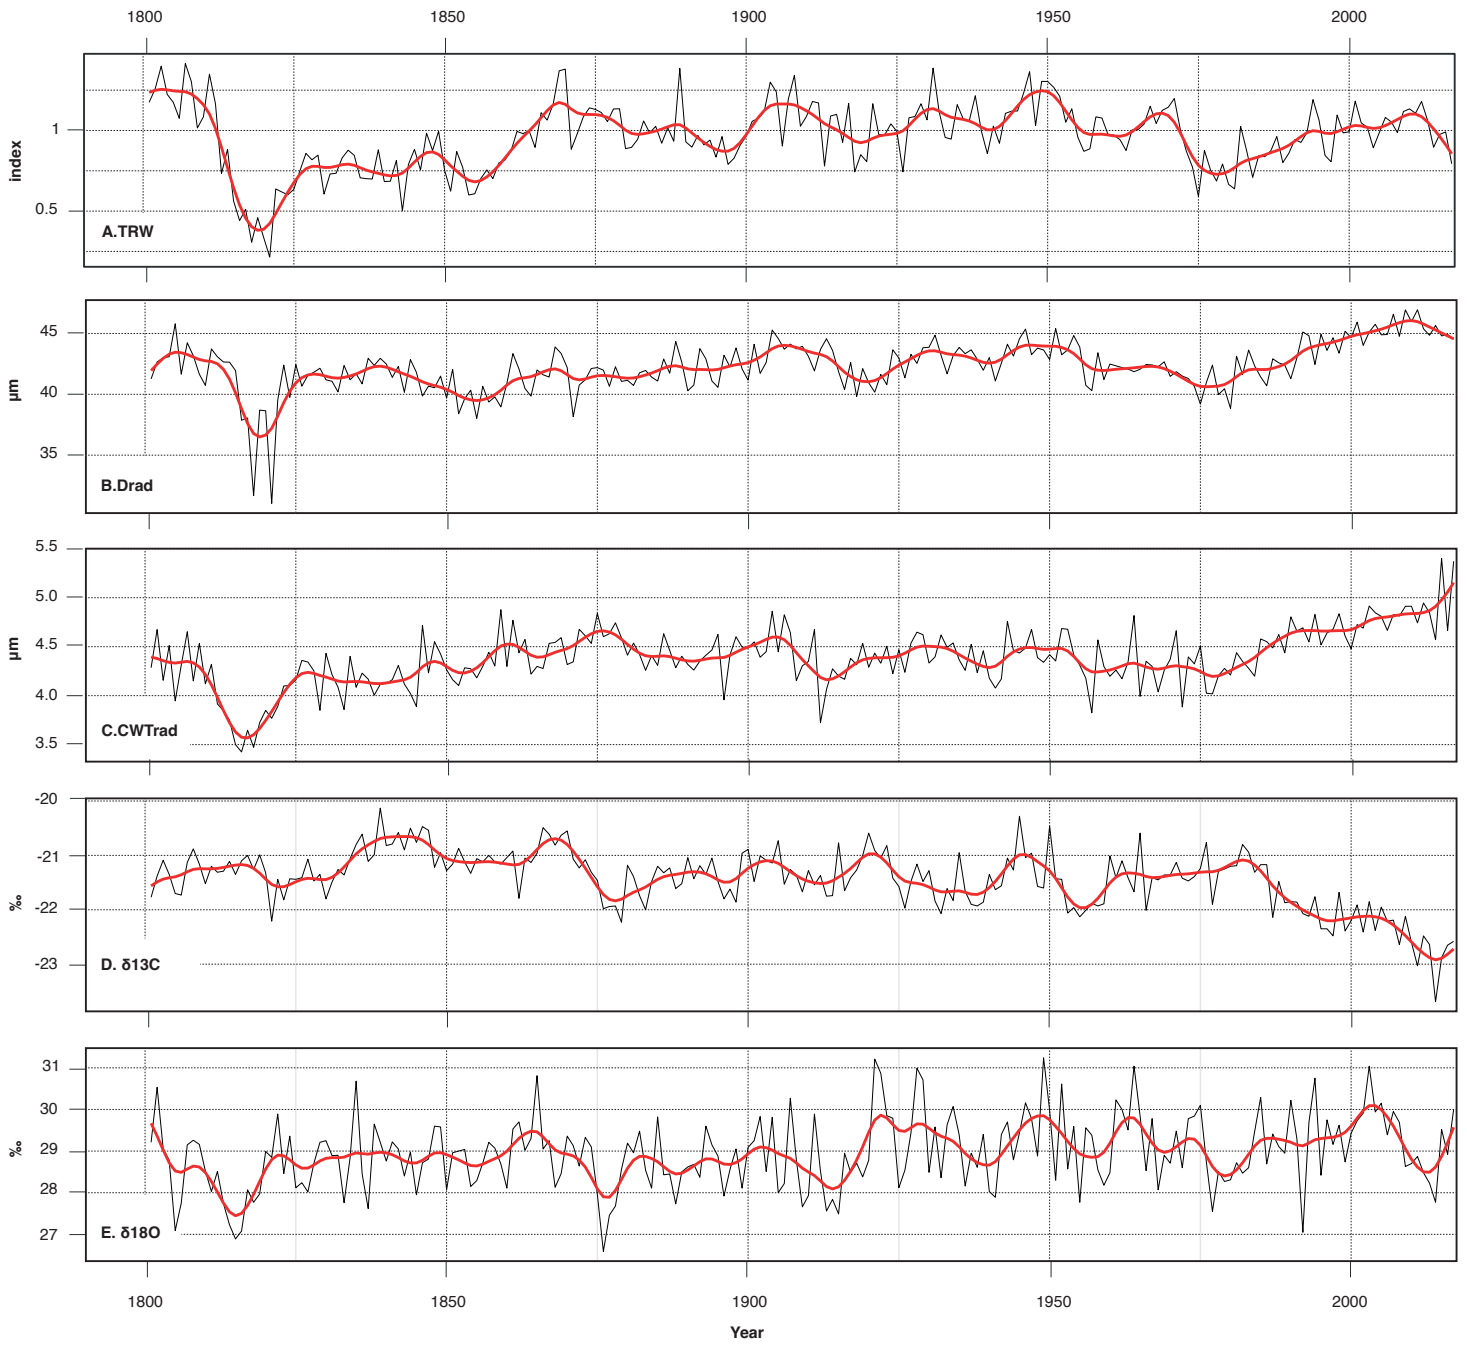

| <b>Wood proxy</b>                                              | <b>Bandwith<br/>(<math>\mu\text{m}</math>)</b> | <b>EPS</b> | <b>Rbar</b> |
|----------------------------------------------------------------|------------------------------------------------|------------|-------------|
| Tree-ring width (TRW)                                          |                                                | 0.85       | 0.39        |
| Radial diameter ( $D_{\text{rad}}$ ) -<br>Earlywood            | 40                                             | 0.75       | 0.16        |
| Radial cell wall thickness<br>( $CW_{\text{rad}}$ ) - Latewood | 40                                             | 0.84       | 0.25        |
| $\delta^{13}\text{C}$ (10-yr interval)                         |                                                | 0.9        | 0.46        |
| $\delta^{18}\text{O}$ (10-yr interval)                         |                                                | 0.91       | 0.48        |

| Glacier Mass Balance     | Wood proxies               | RMSE                          | r2                      | RE                       | CE                       |
|--------------------------|----------------------------|-------------------------------|-------------------------|--------------------------|--------------------------|
| Winter Mass Balance (Bw) | Drad                       | [343.22-353.31] 345.38        | [0.03-0.2] 0.1          | [-0.12-0.16] 0.08        | [-0.23-0.14] 0.04        |
|                          | δ18O                       | [350.47-359.87] 352.44        | [0.01-0.14] 0.06        | [-0.10-0.10] 0.04        | [-0.21-0.08] -0.001      |
|                          | <b>δ18O - Drad</b>         | <b>[335.45-347.15] 338.47</b> | <b>[0.07-0.25] 0.15</b> | <b>[-0.11-0.20] 0.08</b> | <b>[-0.22-0.18] 0.06</b> |
| Summer Mass Balance (Bs) | TRW                        | [701.07-721.41] 705.59        | [0.05-0.26] 0.14        | [-0.1-0.23] 0.12         | [-0.19-0.20] 0.07        |
|                          | Drad                       | [685.76-706.51] 690.2         | [0.07-0.29] 0.17        | [-0.08-0.27] 0.16        | [-0.16-0.25] 0.12        |
|                          | CWTrad                     | [585.93-602.33] 589.35        | [0.28-0.51] 0.38        | [0.18-0.51] 0.37         | [0.12-0.5] 0.35          |
|                          | δ18O                       | [728.86-755.31] 734.63        | [0.01-0.18] 0.07        | [-0.19-0.12] 0.04        | [-0.29-0.1] -0.002       |
|                          | TRW - Drad                 | [669.76-699.32] 677.34        | [0.12-0.34] 0.16        | [-0.09-0.3] 0.16         | [-0.18-0.27] 0.12        |
|                          | TRW - CWTrad               | [555.33-576.75] 560.95        | [0.35-0.58] 0.47        | [0.21-0.56] 0.43         | [0.15-0.55] 0.4          |
|                          | TRW - δ18O                 | [689.24-719.44] 697.43        | [0.08-0.31] 0.18        | [-0.16-0.25] 0.11        | [-0.25-0.23] 0.07        |
|                          | Drad - CWTrad              | [584.24-606.58] 589.88        | [0.29-0.53] 0.41        | [0.14-0.52] 0.35         | [0.08-0.5] 0.33          |
|                          | Drad - δ18O                | [657.71-687.24] 665.3         | [0.15-0.38] 0.25        | [-0.07-0.33] 0.19        | [-0.15-0.31] 0.15        |
|                          | CWTrad - δ18O              | [584.65-609.98] 591.26        | [0.30-0.52] 0.41        | [0.11-0.5] 0.34          | [0.08-0.48] 0.32         |
|                          | <b>CWTrad - TRW - Drad</b> | <b>[471.23-601.00] 537.12</b> | <b>[0.37-0.6] 0.49</b>  | <b>[0.19-0.57] 0.43</b>  | <b>[0.14-0.55] 0.4</b>   |
